# Supplementary material for: Anion induced structural transformation in silver-(3,6-dimethoxy-1,2,4,5-tetrazine) coordination polymers under mechanochemical conditions
Source: Royal Society of Chemistry journal article supplement (doi:10.1039/c6dt01834c), 2016-01-01
Supplement: c6dt01834c1.pdf [file c6dt01834c1.pdf]

*Supporting Information for*

**Anion induced structural transformation in silver-(3,6-dimethoxy-1,2,4,5-tetrazine) coordination polymers under mechanochemical conditions**

Philjae Kang, Sooyong Jung, Junhyung Lee, Hye Ji Kang, Hyehee Lee and Moon-Gun Choi\*

Department of Chemistry, Yonsei University, Seoul, 120-749, Republic of Korea

\*Corresponding author.

E-mail address: choim@yonsei.ac.kr (Moon-Gun Choi).

**General Methods** All glassware was oven-dried prior to use. Powder X-ray diffraction (PXRD) analysis was performed on a RIGAKU Ultima IV diffractometer using Cu K $\alpha$  radiation (wavelength 1.541 Å) in focused beam configuration with a continuous scan rate of 3° min<sup>-1</sup> in the 3-80° range. Simulated PXRD patterns were calculated from single crystal X-ray diffraction data using the Mercury 3.3 program. Elemental analyses were performed on a Thermo Finnigan Flash EA1112 unit. IR spectra were recorded using KBr pellets for solids on a Bruker model Vertex70 spectrometer

Mechanochemical reactions were carried out in a FRITSCH Pulverisette 23 mini-mill model, using 10 ml zircon oxide grinding bowls with 10 mm diameter zirconium oxide milling balls. The reactions were monitored by powder X-ray diffractions.

**Materials** Silver(I) perchlorate (AgClO<sub>4</sub>, anhydrous, Alfa Aesar) and Silver(I) trifluoromethanesulfonate (AgCF<sub>3</sub>SO<sub>3</sub>, 98 %, Alfa Aesar) were used as received. 3,6-dimethoxy-1,2,4,5-tetrazine (**dmotz**) was prepared and purified by sublimation following literature procedure previously reported.<sup>1</sup>

### Synthesis of [Ag(**dmotz**)(CF<sub>3</sub>SO<sub>3</sub>)]<sub>n</sub> (1)

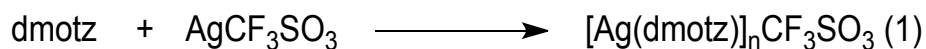

A mixture of Ag(CF<sub>3</sub>SO<sub>3</sub>) (13mg, 0.05 mmol) and **dmotz** (7 mg, 0.05 mmol) were milled in a zirconium oxide grinding bowl with a zirconium oxide milling ball (10 mm in diameter) in a mini-

mill up to 30 Hz for 5 min. Progress of the reaction was monitored by Powder XRD analysis. Initially pink mixture turned to dark red solid with quantitative yields. The single crystal of **1** was obtained by slow diffusion of diethyl ether to THF solution of **1**.

### Synthesis of $[\{\text{Ag}(\text{dmotz})_2\}(\text{ClO}_4)]_n$ (**2**)

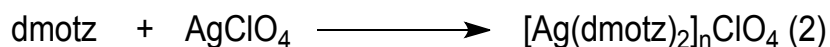

A mixture of  $\text{Ag}(\text{ClO}_4)$  (20 mg, 0.1 mmol) and dmotz (28 mg, 0.2 mmol) were milled in a zirconium oxide grinding bowl with a zirconium oxide milling ball (10 mm in diameter) in a mini-mill up to 40 Hz for 5 min. Progress of the reaction was monitored by Powder XRD analysis. Initially pale pink mixture turned to bright red solid.

The single crystal of **2** was obtained by vapor diffusion of diethyl ether into  $\text{CH}_2\text{Cl}_2$  solution of **1**. Elemental analysis for  $\text{C}_8\text{H}_{12}\text{AgClN}_8\text{O}_8$ , calcd. (%): C, 19.55; H, 2.46; N, 22.80. Found (%): C, 19.53; H, 2.42; N, 22.78.

### Structural transformation from $[\text{Ag}(\text{dmotz})(\text{CF}_3\text{SO}_3)]_n$ to $[\{\text{Ag}(\text{dmotz})_2\}(\text{ClO}_4)]_n$

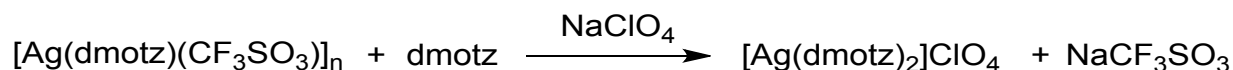

A mixture of compound **1** (40mg, 0.10 mmol),  $\text{NaClO}_4$  (12mg, 0.10 mmol) and dmotz (14mg, 0.1 mmol) were in a zirconium oxide grinding bowl with a zirconium oxide milling ball (10 mm in diameter) in a mini-mill up to 40 Hz for 5 min.

**Single crystal X-ray diffraction analysis of [Ag(dmotz)(CF<sub>3</sub>SO<sub>3</sub>)]<sub>n</sub> (1)** A specimen of suitable size and quality was coated with Paratone oil and mounted on a MiTeGen MicroMount©. Reflection data were collected on a Bruker D8 Venture PHOTON 100 area detector diffractometer, with Mo K<sub>α</sub> ( $\lambda = 0.71073 \text{ \AA}$ ). The full sphere of reflection data was collected as  $\omega$  and  $\phi$  scan frames at 0.5°/frame and an exposure time of 10 s/frame. Cell parameters were determined and refined by the APEX2 program.<sup>2</sup> Data reduction was performed using the SAINT software.<sup>3</sup> The data were corrected for Lorentz and polarization effects. Empirical absorption correction was applied using the SADABS program.<sup>4</sup> The structure was solved by direct methods and all nonhydrogen atoms were subjected to anisotropic refinement by full-matrix least-squares on F<sup>2</sup> using the SHELXTL and Olex 2 GUI program.<sup>5</sup> Hydrogen atoms were placed at their geometrically calculated positions and refined riding on the corresponding carbon atoms with isotropic thermal parameters.

**Single crystal X-ray diffraction analysis of  $[\{\text{Ag}(\text{dmtz})\}(\text{ClO}_4)]_n$  (2)** A specimen of suitable size and quality was coated with Paratone oil and mounted on a MiTeGen MicroMount<sup>®</sup>. Reflection data were collected on a Bruker D8 Venture PHOTON 100 area detector diffractometer, with Mo  $K_\alpha$  ( $\lambda = 0.71073 \text{ \AA}$ ). The full sphere of reflection data was collected as  $\omega$  and  $\phi$  scan frames with  $1^\circ/\text{frame}$  and an exposure time of 20 s/frame. Cell parameters were determined and refined by the APEX2 program.<sup>2</sup> Data reduction was performed using SAINT software.<sup>3</sup> The data were corrected for Lorentz and polarization effects. An empirical absorption correction was applied using the SADABS program.<sup>4</sup> The structure was solved by direct methods, and all nonhydrogen atoms were subjected to anisotropic refinement by full-matrix least-squares on  $F^2$  using the SHELXTL and Olex 2 GUI program.<sup>5</sup> Hydrogen atoms were placed at their geometrically calculated positions and refined riding on the corresponding carbon atoms with isotropic thermal parameters.

**Table S1.** Crystallographic Data for [Ag(dmotz)(CF<sub>3</sub>SO<sub>3</sub>)]<sub>n</sub>, **1** and [Ag(dmotz)<sub>2</sub>(CF<sub>3</sub>SO<sub>3</sub>)]<sub>n</sub>, **2**

|                                             | <b>1</b>                                                                       | <b>2</b>                                                         |
|---------------------------------------------|--------------------------------------------------------------------------------|------------------------------------------------------------------|
| Empirical formula                           | C <sub>5</sub> H <sub>6</sub> AgF <sub>3</sub> N <sub>4</sub> O <sub>5</sub> S | C <sub>8</sub> H <sub>12</sub> AgClN <sub>8</sub> O <sub>8</sub> |
| Formula weight                              | 399.07                                                                         | 491.58                                                           |
| Temperature/K                               | 303.5                                                                          | 139.9                                                            |
| Crystal system                              | Orthorhombic                                                                   | triclinic                                                        |
| Space group                                 | Aea2                                                                           | P-1                                                              |
| a/Å                                         | 20.8674(13)                                                                    | 7.1463(10)                                                       |
| b/Å                                         | 14.9814(10)                                                                    | 7.5474(10)                                                       |
| c/Å                                         | 7.6418(4)                                                                      | 7.6047(10)                                                       |
| α/°                                         | 90                                                                             | 87.511(5)                                                        |
| β/°                                         | 90                                                                             | 88.728(5)                                                        |
| γ/°                                         | 90                                                                             | 74.489(5)                                                        |
| Volume/Å <sup>3</sup>                       | 2389.0(3)                                                                      | 394.83(9)                                                        |
| Z                                           | 8                                                                              | 1                                                                |
| ρ <sub>calc</sub> /mm <sup>3</sup>          | 2.219                                                                          | 2.067                                                            |
| m/mm <sup>-1</sup>                          | 1.925                                                                          | 1.508                                                            |
| F(000)                                      | 1552.0                                                                         | 244.0                                                            |
| Crystal size/mm <sup>3</sup>                | 0.3 × 0.2 × 0.2                                                                | 0.2 × 0.1 × 0.1                                                  |
| Radiation                                   | MoKα (λ = 0.71073)                                                             | MoKα (λ = 0.71073)                                               |
| 2θ range for data collection                | 5.438 to 49.96                                                                 | 5.362 to 86.724                                                  |
| Index ranges                                | -24 ≤ h ≤ 24, -17 ≤ k ≤ 17, -8 ≤ l ≤ 9                                         | -13 ≤ h ≤ 13, -14 ≤ k ≤ 14, -14 ≤ l ≤ 14                         |
| Reflections collected                       | 26101                                                                          | 25128                                                            |
| Independent reflections                     | 2018<br>[R(int) = 0.0193, R(sigma) = 0.0083]                                   | 5711<br>[R <sub>int</sub> = 0.0503, R <sub>sigma</sub> = 0.0521] |
| Data/restraints/parameters                  | 2018/1/175                                                                     | 5711/0/141                                                       |
| Goodness-of-fit on F <sup>2</sup>           | 1.103                                                                          | 1.070                                                            |
| Final R indexes [I >= 2σ(I)]                | R <sub>1</sub> = 0.0176, wR <sub>2</sub> = 0.0470                              | R <sub>1</sub> = 0.0346, wR <sub>2</sub> = 0.0748                |
| Final R indexes [all data]                  | R <sub>1</sub> = 0.0179 wR <sub>2</sub> = 0.0473                               | R <sub>1</sub> = 0.0483, wR <sub>2</sub> = 0.0802                |
| Largest diff. peak/hole / e Å <sup>-3</sup> | 0.35/-0.27                                                                     | 0.95/-0.54                                                       |
| Flack parameter                             | 0.002(7)                                                                       |                                                                  |

**Table S2.** Bond Distances (Å) in [Ag(dmotz)<sub>2</sub>(CF<sub>3</sub>SO<sub>3</sub>)<sub>n</sub>], **1**<sup>a</sup>

|                      |          |                      |          |
|----------------------|----------|----------------------|----------|
| Ag1-N1               | 2.298(3) | C6-O9                | 1.317(5) |
| Ag1-N2 <sup>1</sup>  | 2.378(3) | O7-C8                | 1.438(6) |
| Ag1-O13 <sup>1</sup> | 2.494(6) | O9-C10               | 1.448(6) |
| Ag1-O13              | 2.524(5) | S11-C12              | 1.805(6) |
| N1-N2                | 1.311(5) | S11-O13              | 1.436(4) |
| N1-C6                | 1.337(5) | S11-O14              | 1.408(4) |
| N2-Ag1 <sup>2</sup>  | 2.378(3) | S11-O15              | 1.438(4) |
| N2-C3                | 1.341(6) | C12-F16              | 1.330(7) |
| C3-N4                | 1.333(5) | C12-F17              | 1.324(7) |
| C3-O7                | 1.308(6) | C12-F18              | 1.297(6) |
| N4-N5                | 1.313(6) | O13-Ag1 <sup>2</sup> | 2.494(6) |
| N5-C6                | 1.326(5) |                      |          |

<sup>1</sup>1/2-X,+Y,1/2+Z; <sup>2</sup>1/2-X,+Y,-1/2+Z<sup>a</sup> Numbers in parentheses are estimated standard deviations in the least significant digits.**Table S3.** Bond Angles (deg) in [Ag(dmotz)<sub>2</sub>(CF<sub>3</sub>SO<sub>3</sub>)<sub>n</sub>], **1**<sup>a</sup>

|                                       |            |                           |            |
|---------------------------------------|------------|---------------------------|------------|
| N1-Ag1-N2 <sup>1</sup>                | 120.56(10) | O9-C6-N5                  | 121.3(3)   |
| N1-Ag1-O13                            | 87.71(15)  | C3-O7-C8                  | 118.3(4)   |
| N1-Ag1-O13 <sup>1</sup>               | 147.44(12) | C6-O9-C10                 | 117.8(4)   |
| N2 <sup>1</sup> -Ag1-O13              | 89.97(14)  | O13-S11-C12               | 104.6(3)   |
| N2 <sup>1</sup> -Ag1-O13 <sup>1</sup> | 86.72(12)  | O13-S11-O15               | 109.1(3)   |
| O13 <sup>1</sup> -Ag1-O13             | 111.47(17) | O14-S11-C12               | 103.6(3)   |
| N2-N1-Ag1                             | 121.6(2)   | O14-S11-O13               | 119.0(3)   |
| N2-N1-C6                              | 117.4(3)   | O14-S11-O15               | 114.8(3)   |
| C6-N1-Ag1                             | 120.2(3)   | O15-S11-C12               | 103.9(3)   |
| N1-N2-Ag1 <sup>2</sup>                | 126.4(2)   | F16-C12-S11               | 110.6(4)   |
| N1-N2-C3                              | 117.4(3)   | F17-C12-S11               | 111.6(4)   |
| C3-N2-Ag1 <sup>2</sup>                | 114.1(3)   | F17-C12-F16               | 104.4(6)   |
| N4-C3-N2                              | 124.6(5)   | F18-C12-S11               | 112.2(4)   |
| O7-C3-N2                              | 113.9(3)   | F18-C12-F16               | 107.9(5)   |
| O7-C3-N4                              | 121.5(5)   | F18-C12-F17               | 109.7(6)   |
| N5-N4-C3                              | 117.6(4)   | Ag1 <sup>2</sup> -O13-Ag1 | 107.95(14) |
| N4-N5-C6                              | 117.5(3)   | S11-O13-Ag1               | 147.7(4)   |
| N5-C6-N1                              | 125.1(4)   | S11-O13-Ag1 <sup>2</sup>  | 104.1(3)   |
| O9-C6-N1                              | 113.6(4)   |                           |            |

<sup>1</sup>1/2-X,+Y,1/2+Z; <sup>2</sup>1/2-X,+Y,-1/2+Z<sup>a</sup> Numbers in parentheses are estimated standard deviations in the least significant digits.

**Table S4.** Bond Distances (Å) in [Ag(dmotz)<sub>2</sub>(ClCO<sub>4</sub>)]<sub>n</sub>, 2<sup>a</sup>

|                     |            |                    |            |
|---------------------|------------|--------------------|------------|
| Ag1-N1              | 2.4593(10) | N4-C6 <sup>3</sup> | 1.3370(14) |
| Ag1-N1 <sup>1</sup> | 2.4593(10) | N5-C6              | 1.3379(14) |
| Ag1-N4 <sup>1</sup> | 2.4341(10) | C6-N4 <sup>3</sup> | 1.3371(14) |
| Ag1-N4              | 2.4342(10) | C6-O9              | 1.3267(13) |
| N1-N2               | 1.3160(15) | O7-C8              | 1.4439(18) |
| N1-C3 <sup>2</sup>  | 1.3366(13) | O9-C10             | 1.4433(18) |
| N2-C3               | 1.3334(14) | Cl11-O12           | 1.442(3)   |
| C3-N1 <sup>2</sup>  | 1.3366(13) | Cl11-O13           | 1.369(2)   |
| C3-O7               | 1.3242(15) | Cl11-O14           | 1.476(2)   |
| N4-N5               | 1.3197(13) | Cl11-O15           | 1.451(2)   |

<sup>1</sup>1/2-X,+Y,1/2+Z; <sup>2</sup>1/2-X,+Y,-1/2+Z<sup>a</sup> Numbers in parentheses are estimated standard deviations in the least significant digits.**Table S5.** Bond Angles (deg) in [Ag(dmotz)<sub>2</sub>( Ag(dmotz)<sub>2</sub>(ClCO<sub>4</sub>)<sub>n</sub>), 2<sup>a</sup>

|                                      |            |                         |            |
|--------------------------------------|------------|-------------------------|------------|
| N1 <sup>1</sup> -Ag1-N1              | 180.00(5)  | N5-N4-C6 <sup>3</sup>   | 117.92(9)  |
| N4 <sup>1</sup> -Ag1-N1 <sup>1</sup> | 87.30(3)   | C6 <sup>3</sup> -N4-Ag1 | 113.48(7)  |
| N4-Ag1-N11                           | 92.70(3)   | N4-N5-C6                | 116.48(9)  |
| N4-Ag1-N1                            | 87.30(3)   | N4 <sup>3</sup> -C6-N5  | 125.60(9)  |
| N4 <sup>1</sup> -Ag1-N1              | 92.70(3)   | O9-C6-N4 <sup>3</sup>   | 113.52(10) |
| N4 <sup>1</sup> -Ag1-N4              | 180        | O9-C6-N5                | 120.87(10) |
| N2-N1-Ag1                            | 127.29(6)  | C3-O7-C8                | 117.49(11) |
| N2-N1-C3 <sup>2</sup>                | 117.61(9)  | C6-O9-C10               | 117.47(11) |
| C3 <sup>2</sup> -N1-Ag1              | 115.08(8)  | O12-Cl11-O14            | 107.79(16) |
| N1-N2-C3                             | 116.94(9)  | O12-Cl11-O15            | 108.5(2)   |
| N2-C3-N1 <sup>2</sup>                | 125.45(11) | O13-Cl11-O12            | 111.86(19) |
| O7-C3-N1 <sup>2</sup>                | 113.57(10) | O13-Cl11-O14            | 110.26(17) |
| O7-C3-N2                             | 120.98(9)  | O13-Cl11-O15            | 112.57(18) |
| N5-N4-Ag1                            | 128.59(7)  | O15-Cl11-O14            | 105.58(16) |

<sup>1</sup>1/2-X,+Y,1/2+Z; <sup>2</sup>1/2-X,+Y,-1/2+Z<sup>a</sup> Numbers in parentheses are estimated standard deviations in the least significant digits.



**Figure S1.** Asymmetric unit of **1** with 50% probability thermal ellipsoids(Up) and packing structure(down).

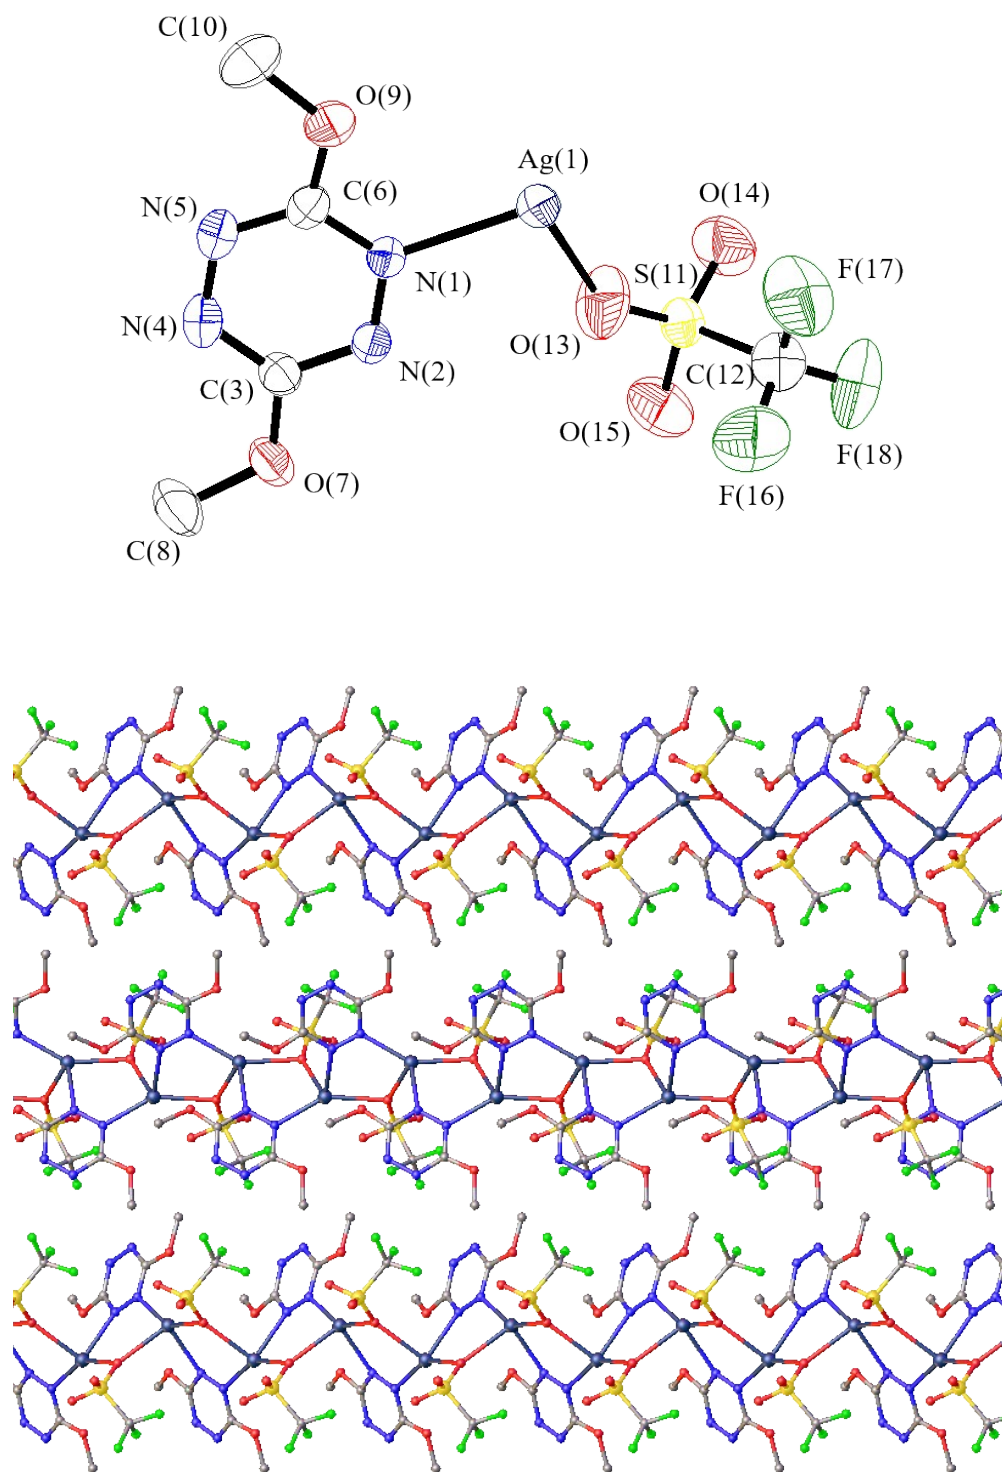

**Figure S2.** Asymmetric unit of **2** with 50% probability thermal ellipsoids(Up) and packing structure(down).

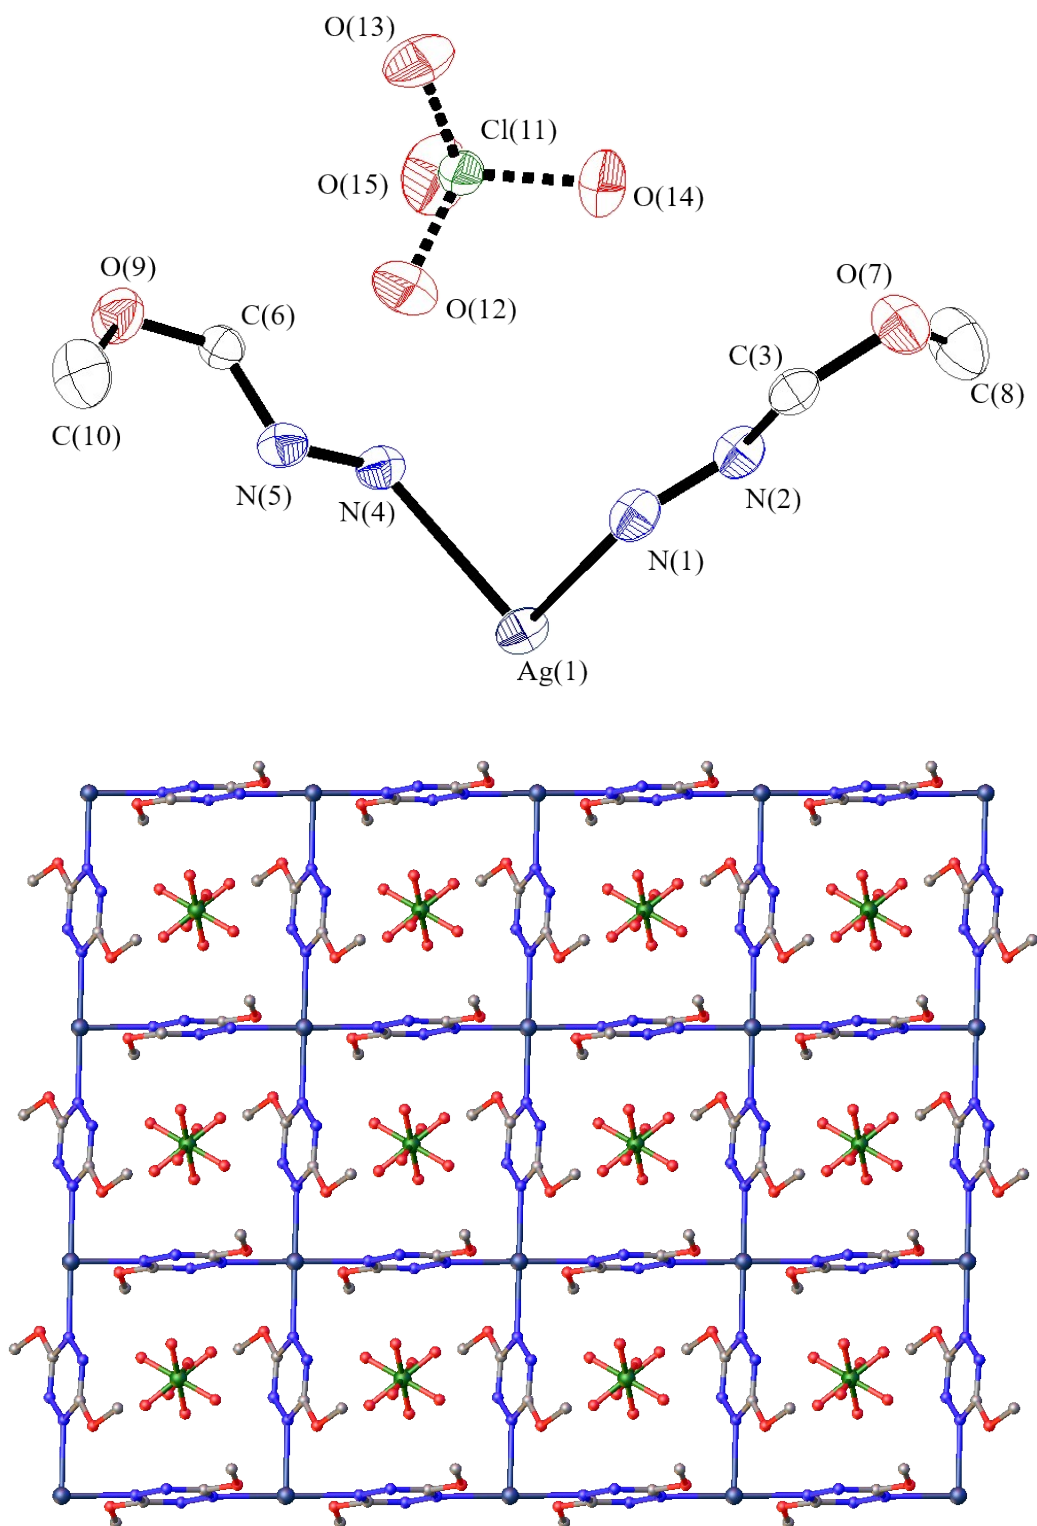

**Figure S3.** PXRD patterns of the mechanochemical synthesis of  $[\text{Ag}(\text{dmotz})(\text{CF}_3\text{SO}_3)]_n$

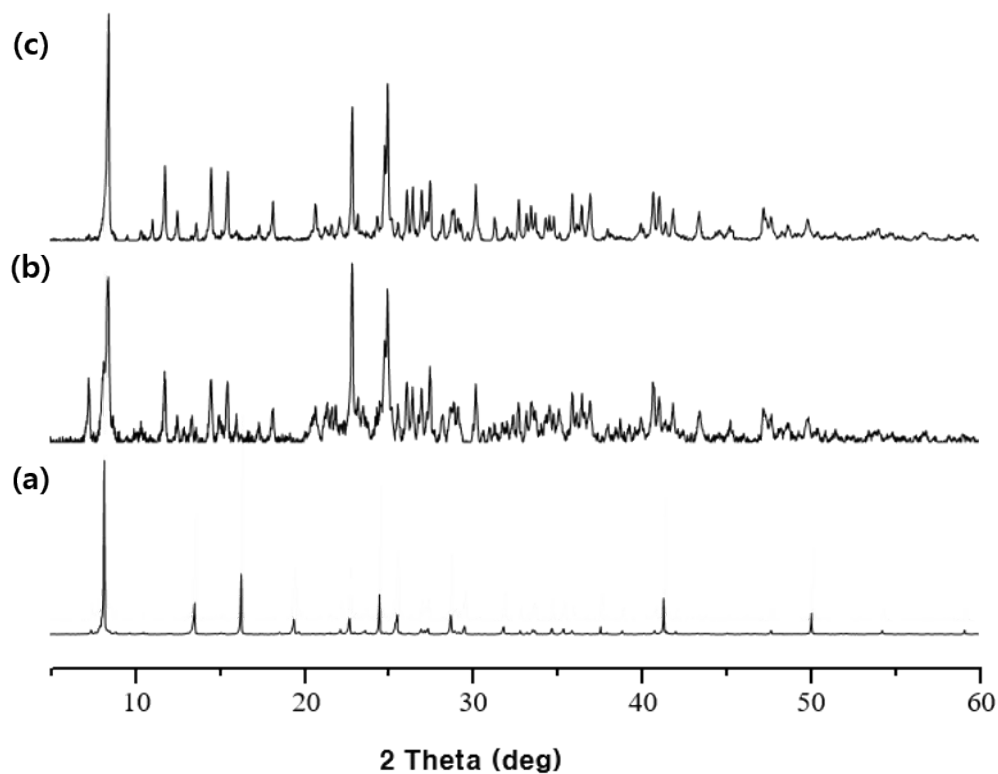

PXRD patterns of: (a) reaction mixture of  $\text{Ag}(\text{CF}_3\text{SO}_3)$  and dmotz; (b) reaction mixture of  $\text{Ag}(\text{CF}_3\text{SO}_3)$  and dmotz after 1 min ball milling(30 Hz); (c) reaction mixture of  $\text{Ag}(\text{CF}_3\text{SO}_3)$  and dmotz after 2 min ball milling(30 Hz)

**Figure S4.** PXRD patterns of the mechanochemical synthesis of  $[\text{Ag}(\text{dmtz})_2(\text{CF}_3\text{SO}_3)]_n$

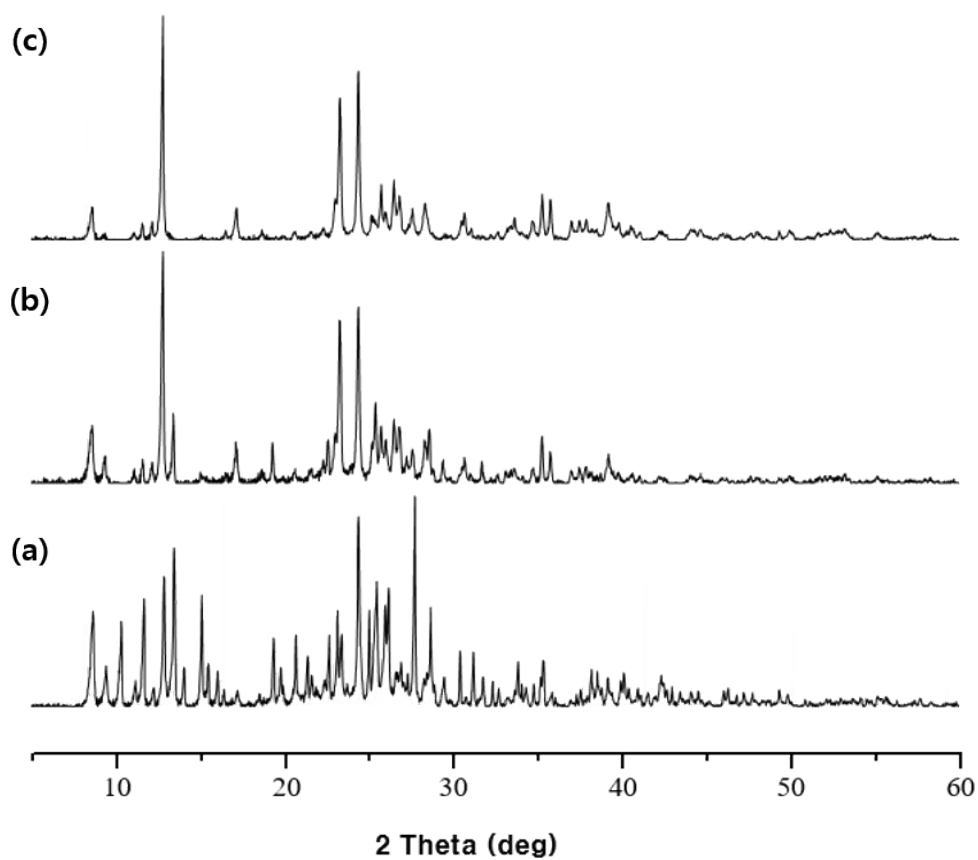

PXRD patterns of: (a) reaction mixture of  $\text{Ag}(\text{ClO}_4)$  and dmtz; (b) reaction mixture of  $\text{Ag}(\text{ClO}_4)$  and dmtz after 1 min ball milling(25 Hz); (c) reaction mixture of  $\text{Ag}(\text{ClO}_4)$  and dmtz after 2 min ball milling(25 Hz)

**Figure S5.** PXRD patterns of with NaClO<sub>4</sub>, (a) [ $\{\text{Ag}(\text{dmotz})_2\}(\text{ClO}_4)_n$ ], (b)  $\{\text{Ag}(\text{dmotz})_2\}(\text{ClO}_4)_n$ , Na(CF<sub>3</sub>SO<sub>3</sub>) from the reaction of **1** (c) Na(CF<sub>3</sub>SO<sub>3</sub>) and (d)  $[\text{Ag}(\text{dmotz})(\text{CF}_3\text{SO}_3)]_n$ .

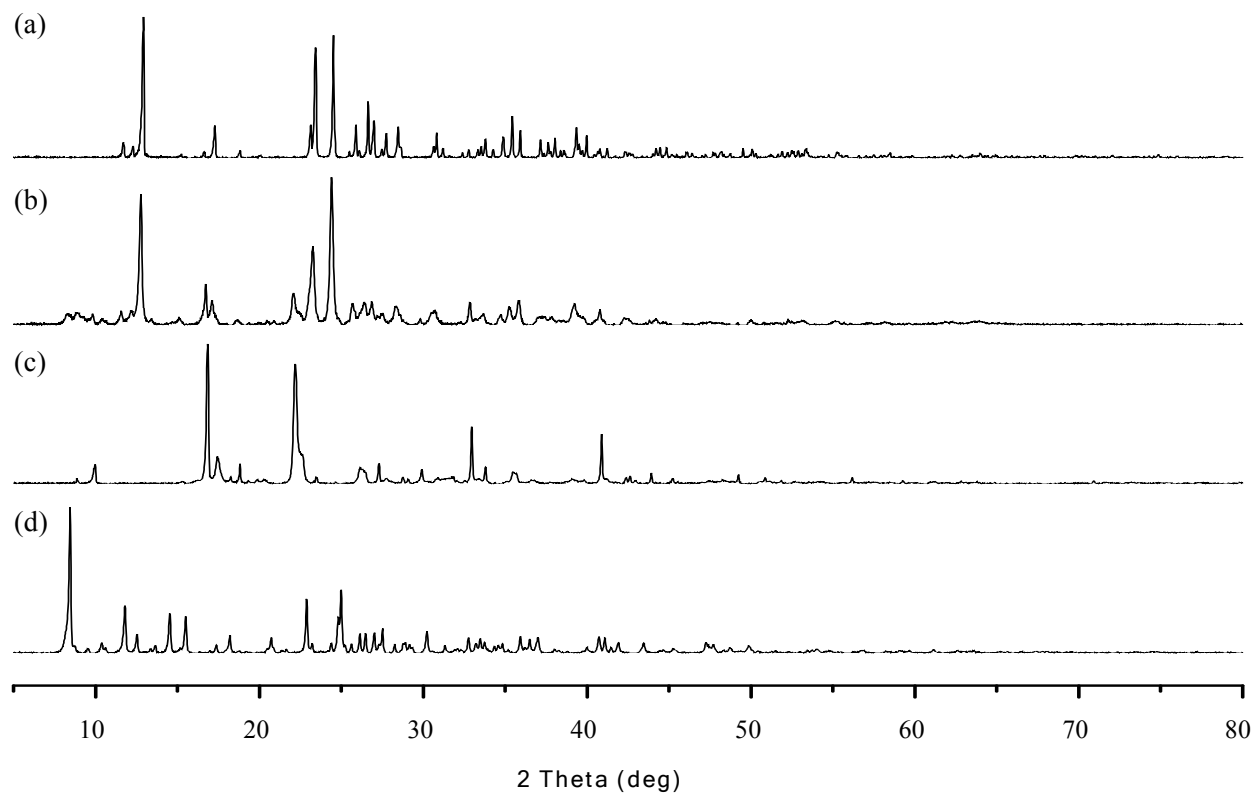

Figure S6. FT-IR spectrum for (a) dmotz, (b)  $[\text{Ag}(\text{dmotz})(\text{CF}_3\text{SO}_3)]_n$  and  $\{\text{Ag}(\text{dmotz})_2\}(\text{ClO}_4)_n$ .

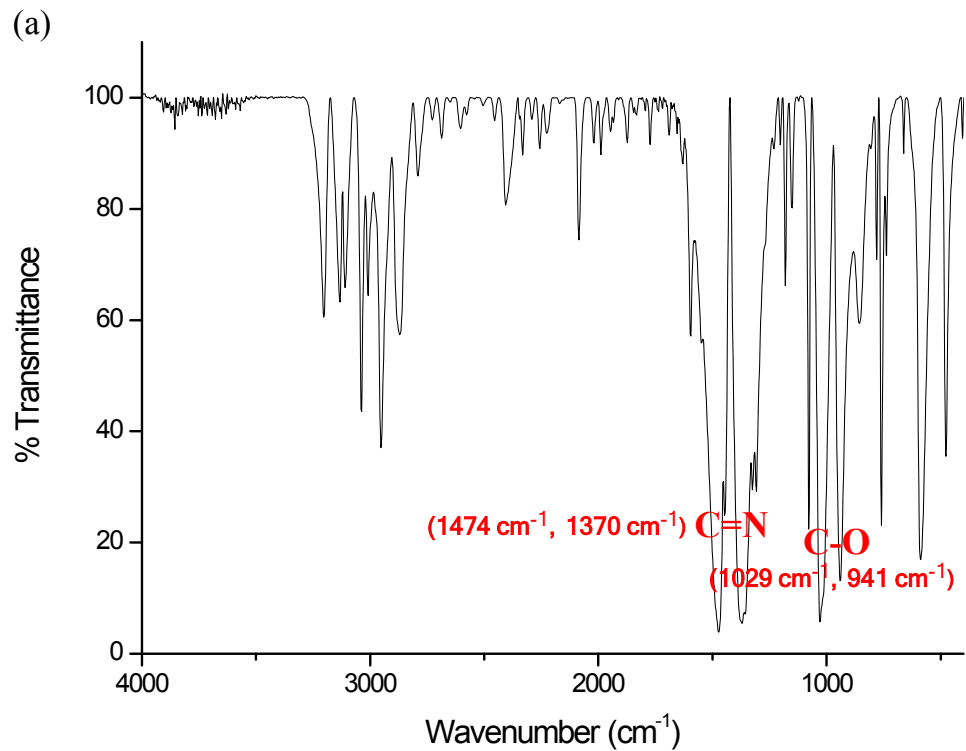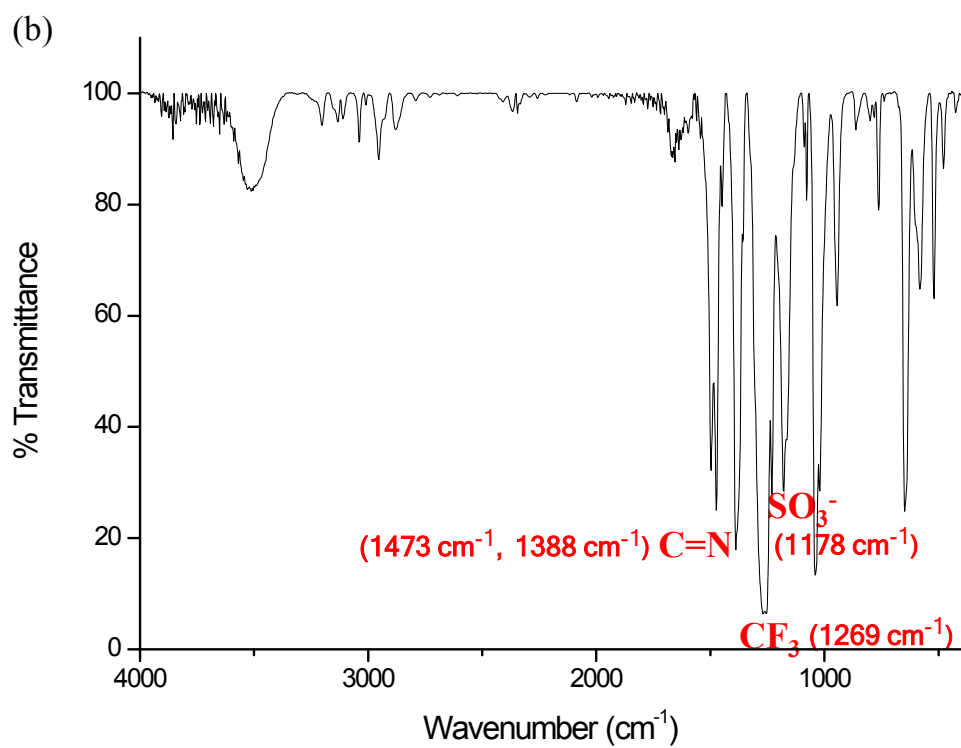

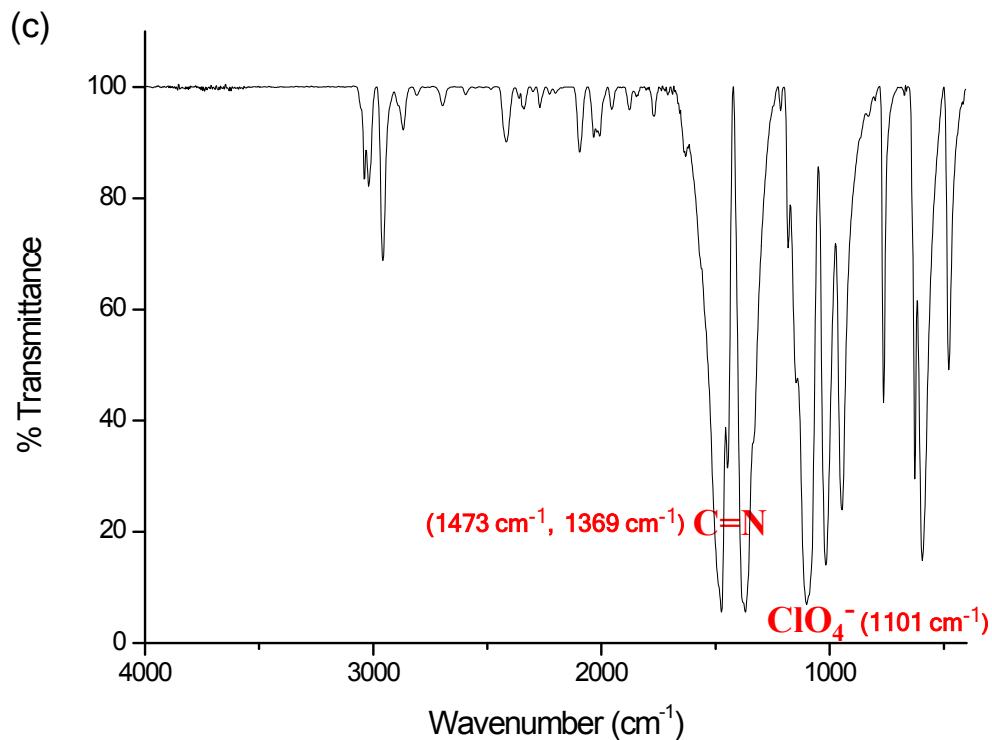

### Supporting Information References:

<sup>1</sup>(a) Y. H. Gong, F. Miomandne, R. Méallet-Renault, S. Badré, L. Galmiche, J. Tang, P. Audebert, G. Clavier, *Eur. J. Org. Chem.* 2009, 6121-6128; (b) R. I. Ishmetova, N. I. Latosh, I. N. Ganebnykh, N. K. Ignatenko, S. G. Tolshchina, G. L. Rusinov, *Russ. J. Org. Chem.*, 2009, **45**, 1102-1107

<sup>2</sup> *APEX2 (version 2012.2-0)*, Data collection software, Bruker AXS Inc., Madison, Wisconsin, (2011).

<sup>3</sup> *SAINT (version 6.0)*, Data integration software, Bruker AXS Inc., Madison, Wisconsin, (2011).

<sup>4</sup> G. M. Sheldrick, *version 2.05 SADABS, Program for absorption correction with the Bruker SMART system*, Universität Göttingen, Germany (2011).

<sup>5</sup> (a) G. M. Sheldrick, *SHELXL-93, Program for the refinement of crystal structures*, Universität Göttingen, Germany (2004). (b) Dolomanov, O.V.; Bourhis, L.J.; Gildea, R.J.; Howard, J.A.K.; Puschmann, H., *OLEX2: A complete structure solution, refinement and analysis program* (2009). *J. Appl. Cryst.*, **42**, 339-341.
